# Supplementary material
Source: Springer Nature journal article supplement (https://www.springermedizin.de/resource/supplementary/12874_2012_991_MOESM3_ESM.pdf/9433018)
Supplement: MOESM3 [file 9433018]

|                                      |     |                                                                                     |                         |
|--------------------------------------|-----|-------------------------------------------------------------------------------------|-------------------------|
| Professional role                    | 154 | I think, sometimes, I think again <u>paediatrics has more in common</u>             | Family centred care;    |
|                                      | 155 | <u>with General Practice than most specialties,</u> but obviously <u>in General</u> | holistic versus disease |
|                                      | 156 | <u>Practice you're looking at the whole person, not just the disease</u> and        | model; 1° vs. 2° care   |
| Place & Space                        | 157 | obviously the good quality Paediatrician does that and <u>if you're</u>             | Local = more holistic – |
|                                      | 158 | <u>seeing people nearer to their home setting,</u> then you can see, you            | families in their       |
| Place & Space;<br>Patient experience | 159 | know an <u>outpatient department is a bit remote</u> and I'm not saying             | environment not         |
|                                      | 160 | it's inhumane but <u>if you are in a setting you're comfortable in,</u>             | doctors; more relaxed;  |
|                                      | 161 | <u>you're going to be more relaxed,</u> you might be <u>more honest and</u>         | shift in power?         |
| Primary-<br>secondary care           | 162 | <u>open and give better quality answers particularly if there are social</u>        | Experience differs      |
|                                      | 163 | <u>issues. It would be good for consultants to be, you know recognised</u>          | according to setting –  |
|                                      | 164 | <u>in a certain area</u> and I think they would appreciate that as well. So         | impact on consultation  |
| Quality of care                      | 165 | no I think, obviously <u>ways in which care could deteriorate are in</u>            | / outcomes?             |
|                                      | 166 | <u>terms of records</u> because obviously if the consultant doesn't have            | Construction of         |
| Technology                           | 167 | the notes, that's a disaster, so I don't know what the <u>IT set up</u> would       | consultant as           |
|                                      | 168 | be like, that would, you know obviously if the <u>consultant can access</u>         | detached?               |
|                                      | 169 | <u>notes remotely</u> whatever you're planning, that would be very, very            | Notes, technology, IT   |
|                                      | 170 | important.                                                                          | systems affect quality  |
|                                      |     |                                                                                     | of care, risks          |
